# Supplementary material for: Alterations of mitochondrial dynamics allow retrograde propagation of locally initiated axonal insults
Source: PubMed Central journal article supplement (PMC5015069; doi:10.1038/srep32777), 2016-09-08

## **Alterations of mitochondrial dynamics allow retrograde propagation of locally initiated axonal insults**

**Lassus B<sup>1,2</sup>, Magnifico S<sup>1,2</sup>, Pignon S<sup>1,2</sup>, Belenguer P<sup>3</sup>, Miquel MC<sup>3\*</sup> and Peyrin JM<sup>1,2\*</sup>**

**Supplementary Figure 1:** GFP-transfected CGN (GFP<sup>+</sup>-CGN) seeded in microfluidic chambers. Neuronal somas are positioned in the somatic chamber (**left**), their axons growing in the micro-channels (**center, between yellow dotted lines**) and reaching the axonal chamber (**right**). **(a)** Typical 10 Days In Vitro (DIV) GFP<sup>+</sup>-CGN grown in low glucose medium (LG) in both chambers, 48 hours post treatment axonal with sham control medium. **(b-c)** Ten In Vitro (DIV) GFP<sup>+</sup>-CGN grown in low glucose medium 24h (**b**) or 48h (**c**) post axonal rotenone exposure (5 $\mu$ M). Note that application of rotenone in the axonal chamber led to axonal degeneration in the axonal (treated) chamber with a slow and limited retrograde degeneration in the distal part of micro-channel area after 48 hours (white arrow).

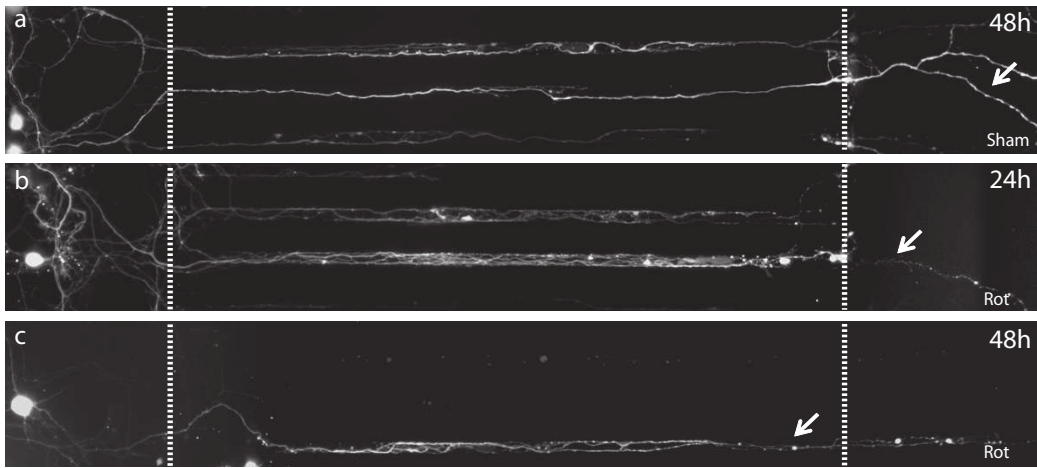

Supplement: srep32777-s1.pdf [file srep32777-s1.pdf]
